# Supplementary material
Source: Springer Nature journal article supplement (https://www.springermedizin.de/resource/supplementary/12955_2012_971_MOESM3_ESM.pdf/9558584)

# ROC Curve

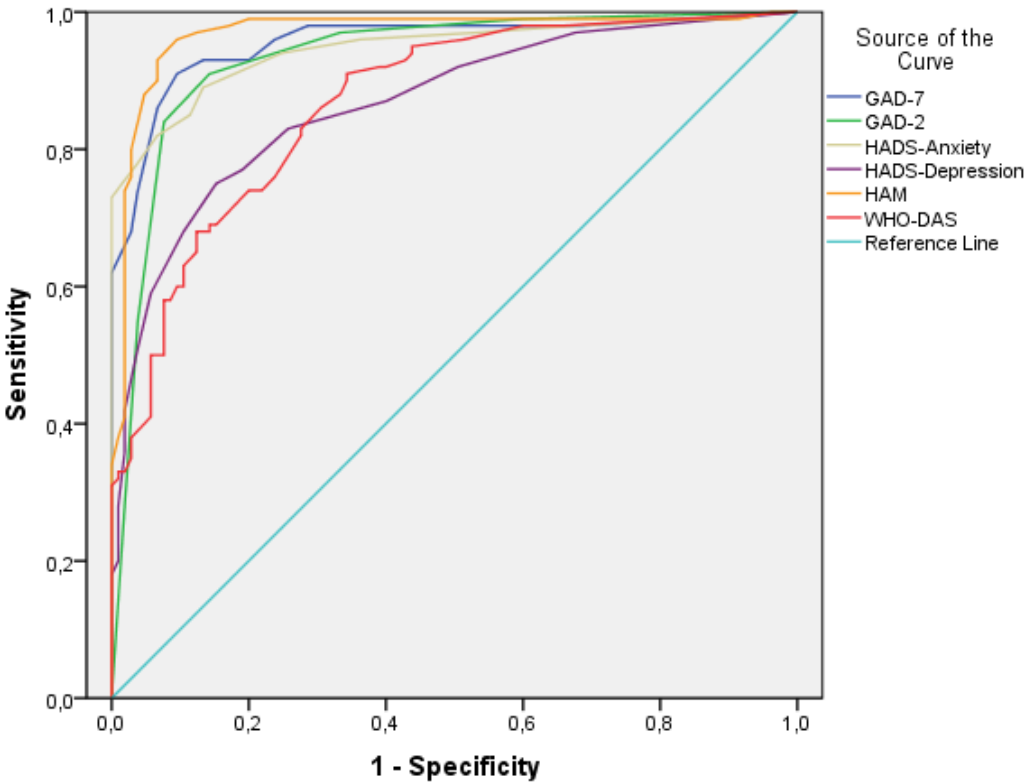

Diagonal segments are produced by ties.

Supplement: MOESM3 [file 9558584]
